# Supplementary material
Source: PubMed Central journal article supplement (PMC5392424)
Supplement: NIHMS831363-supplement-supplement_1.pdf [file NIHMS831363-supplement-supplement_1.pdf]

| <b>Screening Primers</b>  |                    |                              |                         |
|---------------------------|--------------------|------------------------------|-------------------------|
| <b>Polyomavirus</b>       | <b>Primer Name</b> | <b>Sequence (5' to 3')</b>   | <b>Reference</b>        |
| JC, BK (Outer)            | P-3                | GTATACACAGCAAAGGAAGC         | Giraud et al., 2008     |
|                           | P-4                | GCTCATCAGCCTGATTTTGG         |                         |
| JC, BK (Inner)            | P-1                | AGTCTTTAGGGTCTTCTACC         | Giraud et al., 2008     |
|                           | P-2                | GGTGCCAACCTATGGAACAG         |                         |
| KI, WU                    | KIPyV2263.F        | TTGGATGAAAATGGCATTGG         | Giraud et al., 2008     |
|                           | KIPyV2404.R        | TAACCCTTCTTTGTCTAAAATGTAGCC  |                         |
| MCV                       | MCV.F              | GGAATTGAACACCCTTTGGA         | Ho et al., 2014         |
|                           | MCV.R              | CTACAATGCTGGCGAGACAA         |                         |
| HPyV6                     | HPyV6.F            | GGCATTTCAGGAAGTATT           | Ho et al., 2014         |
|                           | HPyV6.R            | AAGTTGAATGCCACCCTGAG         |                         |
| HPyV7                     | HPyV7.F            | AAACTCTGGCCCCAAAACT          | Ho et al., 2014         |
|                           | HPyV7.R            | GAGATCCCCAGAAAATGCAA         |                         |
| TSPyV                     | TSA.F              | TGAAGGCCTATTTTGCAGGT         | Ho et al., 2014         |
|                           | TSA.R              | AGCCAGGTAGGCTCATGGTA         |                         |
| HPyV9                     | HPyV9.F            | AGAGGCGCAGCAAACCTAAA         | Ho et al., 2014         |
|                           | HPyV9.R            | TGGTGGATATCCTGATTGCAT        |                         |
| STL, MW                   | STLMWScreen.F      | GRATGAAAYRCWWTTACAGGTTGCCACC | Lim et al., 2013        |
|                           | STLMWScreen.R      | GTGGWAAAACAACGTAGCWGCTGC     |                         |
| HPyV12                    | HPyV12.VP1731.F    | GTGGGAAGCTGTCAGTGTGA         | Korup et al., 2013      |
|                           | HPyV12.VP1868.R    | CCACCTACTGCAAACATGTG         |                         |
| <b>Sequencing Primers</b> |                    |                              |                         |
| <b>Polyomavirus</b>       | <b>Primer Name</b> | <b>Sequence (5' to 3')</b>   | <b>Reference</b>        |
| HPyV6                     | H6_4628R           | TGAAGACATTTGGTCCCTC          | Schowalter et al., 2010 |
|                           | H6_395L            | AAAGCAGCAGCAGACTGTAGAGCC     |                         |
|                           | H6_160R            | ACTGAGGTTGACCACCGTTG         |                         |
|                           | H6_992L            | ACTCCATTGCCCTCAAAC           |                         |
|                           | H6_679R            | AAGTTTGGTCTTGGGGAGG          |                         |
|                           | H6_1465L           | GGCTTCCCAAACCAACAAAGTATC     |                         |
|                           | H6_2032L           | CTCTCCTCTGTCTGAAGTGAAC       |                         |
|                           | H6_3110R           | CAGCAGCCAATGTTGTTTTG         |                         |
|                           | H6_4117L           | AATAGAGGCTGGGACGATG          |                         |
|                           | H6_3774R           | GCATTTAGCATAGCAGACACTC       |                         |
|                           | H6_4539L           | TTGCCTTCTCAAAAAGGAGC         |                         |
|                           | H6_1068F           | GGGCCCTGTTAGAAGGAAGG         | this study              |
|                           | H6_1710F           | AGCCCCTTGATGTCATTGG          |                         |
|                           | H6_1710R           | GAGGGGTTTACAGCTCACCC         |                         |
|                           | H6_2384F           | GCAAATTTGTTTGGGCCTCCA        |                         |

|                     |                    |                             |                         |
|---------------------|--------------------|-----------------------------|-------------------------|
|                     | H6_2384R           | CAAGGTGTCCCAGCTGTTT         |                         |
|                     | H6_2872F           | CCTCTGGCAATTCTGGCCTT        |                         |
|                     | H6_2872R           | AGCAGCACAAAGAAGGGTGT        |                         |
|                     | H6_3587F           | CAGCTTGCTGGATCATTGGC        |                         |
|                     | H6_3857R           | GGTTTGGCCTACCTGTGGAA        |                         |
|                     | H6_4143F           | GAGAGTTGCCTTCACCAGGG        |                         |
|                     | H6_4143R           | ATGGATCGCCTTTTAGCCAGAG      |                         |
|                     | H6_4716F           | ACATTTGGTCCCTCAGGGTG        |                         |
|                     | H6_4716R           | TGGATCGCCTTTTAGCCAGAG       |                         |
| HPyV7               | contig1.F          | TAGAAGGGTGGAGGCAAATG        | Ho et al., 2014         |
|                     | contig1.R          | CTTCATTGGACACTGCCAGA        |                         |
|                     | contig2.F          | AGCCCTTCAAAGTGCTGCT         |                         |
|                     | contig2.R          | CTACTCAACAGGCTTGCCAAT       |                         |
|                     | contig3.F          | TTCTACTACAGAACAGGAAGAGAG    |                         |
|                     | contig3.R          | TGTGTCCTCCGTGAGTGGTA        |                         |
|                     | contig4.F          | GGAAATGGACCCACACAAA         |                         |
|                     | contig4.R          | ACTTGCTTTCTGAGGGCTTG        |                         |
|                     | contig5.F          | TGAAGCCCTAGAAGGTCCAG        |                         |
|                     | contig5.R          | GCTGCATTTGCTCCATTGTA        |                         |
|                     | contig6.F          | CAGAAGCCACAGGTGCAG          |                         |
|                     | contig6.R          | GAACCAGTGTCTGACTTTGTTGA     |                         |
|                     | contig7.F          | CCATATGACACCCACTGTTCA       |                         |
|                     | contig7.R          | CAGCTGCCATTCTGGATTTA        |                         |
|                     | contig8.F          | CAATAGCACATCCCAGTTCAAA      |                         |
|                     | contig8.R          | TTTGCTACAGAGCCATCACTG       |                         |
|                     | contig9.F          | TGCTTCTCATGGTGTTGGTG        |                         |
|                     | contig9.R          | GCCATGCCACTTTAGGTAACA       |                         |
|                     | contig10.F         | TTCTCATAAAGCAACATACTTTTCTCA |                         |
|                     | contig10.R         | CACTTTTGGCGGGCTAAT          |                         |
|                     |                    |                             |                         |
| <b>qPCR Primers</b> |                    |                             |                         |
| <b>Polyomavirus</b> | <b>Primer Name</b> | <b>Sequence (5' to 3')</b>  | <b>Reference</b>        |
| HPyV6               | HPyV6qPCR.F        | TAGCACTTGTAGCACCAG          | Schowalter et al., 2010 |
|                     | HPyV6qPCR.R        | ATGCCTTCATTGCCTTCT          |                         |
| HPyV7               | HPyV7qPCR.F        | TCTAACCTTATGCTGTATG         |                         |
|                     | HPyV7qPCR.R        | GGTAGAGATGAAGTCAAG          |                         |
| MCV                 | MCVqPCR.F          | GGTGCAGATGCAGTAAGCAG        |                         |
|                     | MCVqPCR.R          | TTGTCTCGCCAGCATTGTAG        |                         |
| LINE1               | LINE1qPCR.F        | TTGCGGCATTATTCACAATAGC      | Yu et al., 2008         |
|                     | LINE1qPCR.R        | GTGCCACATTTTCTTAATCCAGTCT   |                         |

**Table S1. Viral Genomic Changes**

| <b>Location</b>       | <b>HPyV7_UTSW7.1</b>         | <b>HPyV6_UTSW6.1</b>                 |
|-----------------------|------------------------------|--------------------------------------|
| <b>NCCR</b>           | <b>n.148del2</b>             | <b>Ins/del with mult. nt changes</b> |
|                       | <b>n.C202G</b>               |                                      |
| <b>Early (sT, LT)</b> | <b>n.G2594A (p.Thr→Ile)</b>  | <b>n.A2567T</b>                      |
|                       | <b>n.C2877T (p.Val→Ile)</b>  | <b>n.T2923C (p.Ile→Val)</b>          |
|                       | <b>n.C3751T</b>              | <b>n.G2927C (p.Asp→Glu)</b>          |
|                       | <b>n.A3889G</b>              | <b>n.A3026G</b>                      |
|                       |                              | <b>n.G3402T (p.Thr→Lys)</b>          |
|                       |                              | <b>n.T3479A; n.C3478T</b>            |
|                       |                              | <b>(p.Ala→Thr)</b>                   |
|                       |                              | <b>n.C3756T (p.Arg→Lys)</b>          |
| <b>Late (VP1/2/3)</b> |                              | <b>n.A3831G (p.Ile→Thr)</b>          |
|                       | <b>n.G771C</b>               | <b>n.A920G</b>                       |
|                       | <b>n.A1016G</b>              | <b>n.C1449A</b>                      |
|                       | <b>n.A1404C (p.Glut→Asp)</b> | <b>n.1500insCAC (p.insThr)</b>       |
|                       | <b>n.G1929T</b>              | <b>n.G1661A (p.Arg→Lys)</b>          |
| <b>Other</b>          |                              | <b>n.T2034C</b>                      |
|                       | <b>n.C4303A</b>              | <b>n.G2422C (p.Glu→Gln)</b>          |
